# Supplementary material for: Development of Sustainability Assessment Criteria in Selection of Municipal Solid Waste Treatment Technology in Developing Countries: A Case of Ho Chi Minh City, Vietnam
Source: MDPI journal article supplement (doi:10.3390/su15107917), 2023-05-11
Supplement: s1 [file s1]

## Supplementary Materials S1

### Determining the weight in the Analytic Hierarchy Process (AHP)

The Analytic Hierarchy Process (AHP) process consists of four main steps.

Step 1: Determine the priority for the criteria

**Table S1.** Score comparison of indicators

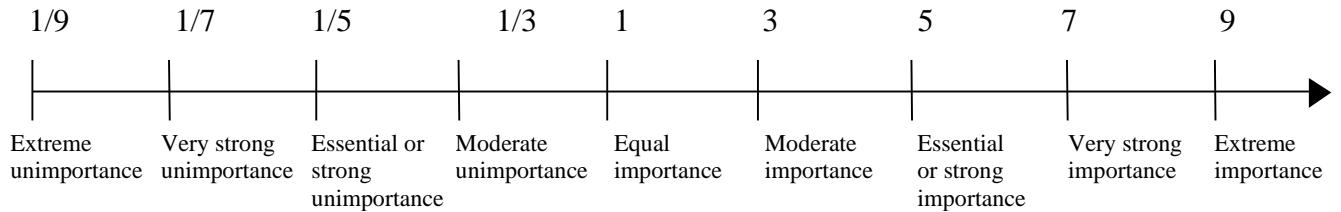

Source: [1]

Carry out the comparison of the criteria in pairs—the importance of the pairs of criteria. Considering the priorities ( $a_{ij}$  values, with  $i$  running in rows,  $j$  running in columns) in pairs of criteria with positive integer values from 1 to 9 or the reciprocal of these numbers, we obtain a matrix square ( $n \times n$ ) like Table S2.

**Table S2.** Priority matrix of criteria

| Criteria | C1       | C2       | C3       | ... | Cn       |
|----------|----------|----------|----------|-----|----------|
| C1       | $a_{11}$ | $a_{12}$ | $a_{13}$ |     | $a_{1n}$ |
| C2       | $a_{21}$ | $a_{22}$ | $a_{23}$ |     | $a_{2n}$ |
| C3       | $a_{31}$ | $a_{32}$ | $a_{33}$ |     | $a_{3n}$ |
| ...      |          |          |          |     |          |
| Cn       | $a_{n1}$ | $a_{n2}$ | $a_{n3}$ |     | $a_{nn}$ |

Step 2: Calculate the weight of the criteria

After completing the above matrix, we proceed to calculate the weights for the criteria by summing the values of the matrix by column, then take each value of the matrix divided by the sum of the corresponding column. The weight of each criterion  $C1, C2, C3, \dots, Cn$  will be equal to the average of the values in each horizontal row. As a result, we have a matrix of 1 column and  $n$  rows.

|     |     |     |     |     |     |          |
|-----|-----|-----|-----|-----|-----|----------|
|     | C1  | C2  | C3  | ... | Cn  | Trọng số |
| C1  | w11 | w13 | w13 |     | w1n | w1       |
| C2  | w21 | w23 | w23 |     | w2n | w2       |
| C3  | w31 | w32 | w33 |     | w3n | w3       |
| ... |     |     |     |     |     | ...      |
| Cn  | wn1 | wn1 | wn1 |     | wnn | wn       |

Next, before obtaining the weighted values ( $w_1, w_2, \dots w_n$ ), it is necessary to validate the consistency of the experts' assessment through consistency ratio (CR). The CR less than or equal to 10% is acceptable [1]. In other words, there is a 10% chance that the experts answer the questions completely at random.

$$CR = \frac{CI}{RI}$$

CR—Consistency ratio; CI—Consistency index; RI—Random index

- Determine the consistency index CI:

$$CI = \frac{\lambda_{\max} - n}{n-1}$$

$\lambda_{\max}$  is the maximum eigenvalue of a pairwise comparison matrix ( $n \times n$ );  $\lambda_{\max}$  is always greater than or equal to the number of rows or columns  $n$ . The more consistent the statement, the closer  $\lambda_{\max}$  to  $n$ .

$$\lambda_{\max} = \frac{1}{n} \left( \frac{\sum_{i=1}^n a_{ij} \cdot w_i}{w_i} \right)$$

- Random Index RI:

**Table S3.** Average random consistency index value

|    |      |      |      |      |      |      |      |      |      |      |      |      |      |      |
|----|------|------|------|------|------|------|------|------|------|------|------|------|------|------|
| n  | 1    | 2    | 3    | 4    | 5    | 6    | 7    | 8    | 9    | 10   | 11   | 12   | 13   | 14   |
| RI | 0.00 | 0.00 | 0.58 | 0.90 | 1.12 | 1.24 | 1.32 | 1.41 | 1.45 | 1.49 | 1.51 | 1.54 | 1.56 | 1.57 |

Step 3: Calculate the priority of the alternatives according to each criterion

In this step, the calculation procedure is as same as that in Step 1 and Step 2, but the data included in this step are the result of comparing the priority of the alternatives, which are based on each criterion from experts' assessment. Thus, the evaluation must perform  $n$  matrices for  $n$  different criteria. As a result, we have  $n$  matrices 1 column  $m$  rows ( $m$  alternatives). Consistency ratio should also be tested to ensure the obtained results adequately.

Step 4: Evaluate the alternatives and make decisions

Multiplying weight matrix of the alternatives, which are obtained from Step 3, by the criteria weight matrix, which are obtained from Step 2, result in a matrix of  $m$  rows ( $m$  alternatives)  $\times$  1 column (weighted values). The resulting matrix will indicate the best option to choose—the one with the highest weight value.

## Supplementary Materials S2

### Weights calculation of criteria groups and MSW treatment technologies using the AHP method

**Table S4. Matrix calculation for comparing the level of importance among criteria groups**

| Comparison |               | Result of expert's assessment |      |      |      |      |      |      |      |      |      |      | A <sub>ij</sub> |
|------------|---------------|-------------------------------|------|------|------|------|------|------|------|------|------|------|-----------------|
| i          | j             | 1st                           | 2nd  | 3rd  | 4th  | 5th  | 6th  | 7th  | 8th  | 9th  | 10th | 11th |                 |
| Economic   | Social        | 0.11                          | 3.00 | 4.00 | 1.00 | 0.14 | 0.33 | 3.00 | 0.20 | 6.00 | 7.00 | 8.00 | 1.257           |
|            | Environmental | 0.20                          | 0.50 | 5.00 | 1.00 | 0.20 | 0.20 | 2.00 | 0.11 | 7.00 | 5.00 | 5.00 | 0.977           |
| Social     | Environmental | 7.00                          | 0.33 | 0.50 | 1.00 | 3.00 | 1.00 | 0.50 | 0.33 | 0.50 | 0.50 | 0.20 | 0.725           |
| CR (%)     |               | 4.6                           | 4.6  | 8.2  | 0.0  | 5.7  | 2.5  | 0.8  | 2.5  | 7.0  | 1.2  | 3.8  | 3.7             |

|      |      |      |      |
|------|------|------|------|
|      | Eco. | Soc. | Env. |
| Eco. | 1.00 | 1.26 | 0.98 |
| Soc. | 0.79 | 1.00 | 0.73 |
| Env. | 1.02 | 1.37 | 1.00 |

|      |      |      |      |       |            |                       |                    |                  |      |        |        |
|------|------|------|------|-------|------------|-----------------------|--------------------|------------------|------|--------|--------|
|      | Eco. | Soc. | Env. | Total | Weight (W) | Vector sum of weights | Vector consistency | $\lambda_{\max}$ | CI   | CR     | CR (%) |
| Eco. | 0.36 | 0.35 | 0.36 | 1.06  | 0.355      | 1.064                 | 2.999              | 2.999            | 0.00 | -0.001 | -0.1   |
| Soc. | 0.28 | 0.28 | 0.27 | 0.83  | 0.275      | 0.826                 | 2.999              |                  |      |        |        |
| Env. | 0.36 | 0.38 | 0.37 | 1.11  | 0.370      | 1.109                 | 2.999              |                  |      |        |        |

**Table S5. Matrix calculation for comparing the importance level of economic criteria**

| Comparison                      |                                 | Result of expert's assessment |      |      |      |      |      |      |      |      |      |      | A <sub>ij</sub> |
|---------------------------------|---------------------------------|-------------------------------|------|------|------|------|------|------|------|------|------|------|-----------------|
| i                               | j                               | 1st                           | 2nd  | 3rd  | 4th  | 5th  | 6th  | 7th  | 8th  | 9th  | 10th | 11th |                 |
| Investment cost                 | Operation and maintenance costs | 3.00                          | 0.33 | 3.00 | 3.00 | 0.33 | 4.00 | 5.00 | 4.00 | 0.33 | 5.00 | 5.00 | 1.996           |
|                                 | Treatment cost                  | 7.00                          | 5.00 | 7.00 | 5.00 | 3.00 | 3.00 | 3.00 | 5.00 | 5.00 | 6.00 | 7.00 | 4.847           |
|                                 | Revenue/Benefit                 | 5.00                          | 7.00 | 5.00 | 3.00 | 5.00 | 4.00 | 7.00 | 3.00 | 3.00 | 3.00 | 9.00 | 4.563           |
| Operation and maintenance costs | Treatment Cost                  | 5.00                          | 6.00 | 4.00 | 3.00 | 5.00 | 3.00 | 2.00 | 4.00 | 5.00 | 2.00 | 3.00 | 3.595           |
|                                 | Revenue/Benefit                 | 7.00                          | 7.00 | 2.00 | 3.00 | 3.00 | 3.00 | 4.00 | 2.00 | 3.00 | 3.00 | 4.00 | 3.426           |
| Treatment cost                  | Revenue/Benefit                 | 0.50                          | 2.00 | 1.00 | 2.00 | 1.00 | 2.00 | 2.00 | 0.33 | 0.33 | 1.00 | 3.00 | 1.093           |
| CR (%)                          |                                 | 9.34                          | 5.84 | 2.16 | 8.37 | 8.44 | 9.09 | 6.18 | 6.70 | 7.37 | 8.58 | 6.25 | 7.44            |

| Indicator                       | Investment cost | Operation and maintenance costs | Treatment cost | Revenue/Benefit |
|---------------------------------|-----------------|---------------------------------|----------------|-----------------|
| Investment cost                 | 1               | 2                               | 4.85           | 4.56            |
| Operation and maintenance costs | 0.5             | 1                               | 3.59           | 3.43            |
| Treatment cost                  | 0.21            | 0.28                            | 1              | 1.09            |
| Revenue/Benefit                 | 0.22            | 0.29                            | 0.92           | 1               |

|                                 | Investment cost | Operation and maintenance costs | Treatment cost | Revenue/Benefit | Total | Weight (W) | Vector sum of weights | CI    | CR    | CR (%) |
|---------------------------------|-----------------|---------------------------------|----------------|-----------------|-------|------------|-----------------------|-------|-------|--------|
| Investment cost                 | 0.52            | 0.56                            | 0.47           | 0.45            | 2.00  | 0.500      | 2.02                  | 0.010 | 0.011 | 1.07   |
| Operation and maintenance costs | 0.26            | 0.28                            | 0.35           | 0.34            | 1.23  | 0.306      | 1.24                  |       |       |        |
| Treatment cost                  | 0.11            | 0.08                            | 0.10           | 0.11            | 0.39  | 0.098      | 0.39                  |       |       |        |
| Revenue/Benefit                 | 0.11            | 0.08                            | 0.09           | 0.10            | 0.38  | 0.096      | 0.38                  |       |       |        |

**Table S6. Matrix calculation for comparing the importance level of social criteria**

| Comparison       |                     | Result of expert's assessment |      |      |      |      |      |      |      |      |      |      | A <sub>ij</sub> |
|------------------|---------------------|-------------------------------|------|------|------|------|------|------|------|------|------|------|-----------------|
| i                | j                   | 1st                           | 2nd  | 3rd  | 4th  | 5th  | 6th  | 7th  | 8th  | 9th  | 10th | 11th |                 |
| Community health | Job creation        | 2.00                          | 0.20 | 0.50 | 0.20 | 5.00 | 3.00 | 3.00 | 5.00 | 5.00 | 0.20 | 5.00 | 1.413           |
|                  | Support policy      | 0.50                          | 1.00 | 4.00 | 2.00 | 2.00 | 7.00 | 7.00 | 0.33 | 7.00 | 0.50 | 6.00 | 2.054           |
|                  | Community consensus | 1.00                          | 0.33 | 0.20 | 0.20 | 4.00 | 5.00 | 4.00 | 0.33 | 6.00 | 0.33 | 7.00 | 1.157           |
| Job creation     | Support policy      | 0.50                          | 5.00 | 2.00 | 3.00 | 0.33 | 3.00 | 3.00 | 0.20 | 3.00 | 3.00 | 3.00 | 1.648           |
|                  | Community consensus | 0.50                          | 2.00 | 0.33 | 1.00 | 1.00 | 3.00 | 3.00 | 0.25 | 0.50 | 0.50 | 6.00 | 1.011           |
| Support policy   | Community consensus | 1.00                          | 0.33 | 0.17 | 0.25 | 5.00 | 0.25 | 2.00 | 1.00 | 0.33 | 0.33 | 3.00 | 0.667           |
| CR (%)           |                     | 2.24                          | 0.15 | 8.41 | 5.79 | 2.80 | 8.45 | 6.73 | 7.37 | 6.51 | 5.79 | 9.72 | 5.81            |

| Indicator           | Community health | Job creation | Support policy | Community consensus |
|---------------------|------------------|--------------|----------------|---------------------|
| Community health    | 1                | 1.41         | 2.05           | 1.16                |
| Job creation        | 0.71             | 1            | 1.65           | 1.01                |
| Support policy      | 0.49             | 0.61         | 1              | 0.67                |
| Community consensus | 0.86             | 0.99         | 1.49           | 1                   |

|                     | Community health | Job creation | Support policy | Community consensus | Total | Weight (W) | Vector sum of weights | Vector consistency | $\lambda_{\max}$ | CI    | CR    | CR (%) |
|---------------------|------------------|--------------|----------------|---------------------|-------|------------|-----------------------|--------------------|------------------|-------|-------|--------|
| Community health    | 0.33             | 0.35         | 0.33           | 0.30                | 1.31  | 0.328      | 1.31                  | 4.01               | 4.008            | 0.003 | 0.003 | 0.29   |
| Job creation        | 0.23             | 0.25         | 0.27           | 0.26                | 1.01  | 0.253      | 1.01                  | 4.01               |                  |       |       |        |
| Support policy      | 0.16             | 0.15         | 0.16           | 0.17                | 0.65  | 0.162      | 0.65                  | 4.01               |                  |       |       |        |
| Community consensus | 0.28             | 0.25         | 0.24           | 0.26                | 1.03  | 0.257      | 1.03                  | 4.01               |                  |       |       |        |

**Table S7.Matrix calculation for comparing the importance level of environmental criteria**

| Comparison              |                         | Result of expert's assessment |      |      |      |      |      |      |      |      |      |      | A <sub>ij</sub> |
|-------------------------|-------------------------|-------------------------------|------|------|------|------|------|------|------|------|------|------|-----------------|
| i                       | j                       | 1                             | 2    | 3    | 4    | 5    | 6    | 7    | 8    | 9    | 10   | 11   |                 |
| Air pollution           | Greenhouse gas emission | 2.00                          | 2.00 | 2.00 | 3.00 | 4.00 | 7.00 | 5.00 | 4.00 | 3.00 | 1.00 | 1.00 | 2.622           |
|                         | Water pollution         | 5.00                          | 3.00 | 3.00 | 5.00 | 5.00 | 5.00 | 3.00 | 3.00 | 5.00 | 2.00 | 3.00 | 3.647           |
|                         | Land quota              | 5.00                          | 4.00 | 4.00 | 4.00 | 8.00 | 3.00 | 6.00 | 4.00 | 4.00 | 3.00 | 3.00 | 4.170           |
| Greenhouse gas emission | Water pollution         | 4.00                          | 3.00 | 2.00 | 2.00 | 3.00 | 3.00 | 0.50 | 3.00 | 4.00 | 3.00 | 3.00 | 2.495           |
|                         | Land quota              | 4.00                          | 2.00 | 2.00 | 3.00 | 2.00 | 0.50 | 4.00 | 3.00 | 5.00 | 4.00 | 1.00 | 2.340           |
| Water pollution         | Land quota              | 1.00                          | 1.00 | 3.00 | 1.00 | 3.00 | 0.33 | 3.00 | 2.00 | 1.00 | 4.00 | 0.33 | 1.335           |
| CR (%)                  |                         | 1.03                          | 1.70 | 4.65 | 2.13 | 8.32 | 7.18 | 6.38 | 9.09 | 6.24 | 5.81 | 5.72 | 5.30            |

| Indicator               | Air pollution | Greenhouse gas emission | Water pollution | Land quota |
|-------------------------|---------------|-------------------------|-----------------|------------|
| Air pollution           | 1.00          | 2.62                    | 3.65            | 4.17       |
| Greenhouse gas emission | 0.38          | 1.00                    | 2.5             | 2.34       |
| Water pollution         | 0.27          | 0.40                    | 1.00            | 1.34       |
| Land quota              | 0.24          | 0.43                    | 0.75            | 1.00       |

|                         | Air pollution | Greenhouse gas emission | Water pollution | Land quota | Total | Weight (W) | Vector sum of weights | Vector consistency | $\lambda_{\max}$ | CI   | CR   | CR (%) |
|-------------------------|---------------|-------------------------|-----------------|------------|-------|------------|-----------------------|--------------------|------------------|------|------|--------|
| Air pollution           | 0.53          | 0.59                    | 0.46            | 0.47       | 2.05  | 0.513      | 2.09                  | 4.07               | 4.04             | 0.01 | 0.01 | 1.43   |
| Greenhouse gas emission | 0.20          | 0.22                    | 0.32            | 0.26       | 1.01  | 0.252      | 1.02                  | 4.05               | 3.02             |      |      |        |
| Water pollution         | 0.14          | 0.09                    | 0.13            | 0.15       | 0.51  | 0.128      | 0.51                  | 4.00               | 2.01             |      |      |        |
| Land quota              | 0.13          | 0.10                    | 0.09            | 0.11       | 0.43  | 0.108      | 0.43                  | 4.03               | 1.01             |      |      |        |

**Table S8. Matrix calculation for comparing MSW treatment technologies based on sustainability criteria**

- Environmental criteria

|              | Landfilling | Composting | Incineration |
|--------------|-------------|------------|--------------|
| Landfilling  | 1.00        | 0.33       | 0.20         |
| Composting   | 3.00        | 1.00       | 0.50         |
| Incineration | 5.00        | 2.00       | 1.00         |

|              | Landfilling | Composting | Incineration | Total | Weight (W) |
|--------------|-------------|------------|--------------|-------|------------|
| Landfilling  | 0.111       | 0.100      | 0.118        | 0.329 | 0.110      |
| Composting   | 0.333       | 0.300      | 0.294        | 0.927 | 0.309      |
| Incineration | 0.556       | 0.600      | 0.588        | 1.744 | 0.581      |

- Social criteria

|              | Landfilling | Composting | Incineration |
|--------------|-------------|------------|--------------|
| Landfilling  | 1.00        | 0.33       | 0.20         |
| Composting   | 3.00        | 1.00       | 2.00         |
| Incineration | 5.00        | 0.50       | 1.00         |

|              | Landfilling | Composting | Incineration | Total | Weight (W) |
|--------------|-------------|------------|--------------|-------|------------|
| Landfilling  | 0.111       | 0.104      | 0.063        | 0.278 | 0.095      |
| Composting   | 0.333       | 0.545      | 0.625        | 1.504 | 0.515      |
| Incineration | 0.556       | 0.273      | 0.313        | 1.141 | 0.390      |

- Economic criteria

|              | Landfilling | Composting | Incineration |
|--------------|-------------|------------|--------------|
| Landfilling  | 1.00        | 2.00       | 0.50         |
| Composting   | 0.50        | 1.00       | 0.33         |
| Incineration | 2.00        | 3.00       | 1.00         |

|              | Landfilling | Composting | Incineration | Total | Weight (W) |
|--------------|-------------|------------|--------------|-------|------------|
| Landfilling  | 0.286       | 0.333      | 0.273        | 0.892 | 0.297      |
| Composting   | 0.143       | 0.167      | 0.180        | 0.490 | 0.163      |
| Incineration | 0.571       | 0.500      | 0.546        | 1.618 | 0.539      |



**Table S9. Matrix calculation for pair-wise comparison of MSW treatment technologies based on sustainability criteria**

|              | Environmental | Social | Economic |
|--------------|---------------|--------|----------|
| Landfilling  | 0.110         | 0.095  | 0.297    |
| Composting   | 0.309         | 0.515  | 0.163    |
| Incineration | 0.581         | 0.390  | 0.539    |

1. Saaty, T.L., *The Analytic Hierarchy Process*. McGraw-Hill, New York, 1980.
